# Supplementary material
Source: PubMed Central journal article supplement (PMC8225732)
Supplement: 41997_2021_531_MOESM1_ESM.pdf [file 41997_2021_531_MOESM1_ESM.pdf]

## SARS-CoV-2 seroprevalence study questionnaire

PROJECT COVID-20-02

1. Identification number (ePROGESA): \_\_\_\_\_
2. Interview date (DD/MM/YYYY): \_\_\_\_\_
3. Gender : F  M
4. Date of birth (DD/MM/YYYY) : \_\_\_\_\_
5. From March 1<sup>st</sup> onwards, were you ill with any symptoms that could make you think of COVID-19?  
No  Yes  Don't know
6. To confirm this, I am going to ask you if you had any of the various symptoms of COVID-19:

|                                                       | No                       | Yes                      | Don't know               |
|-------------------------------------------------------|--------------------------|--------------------------|--------------------------|
| <b>Fever (<math>\geq 38^{\circ}\text{C}</math>)</b>   | <input type="checkbox"/> | <input type="checkbox"/> | <input type="checkbox"/> |
| <b>Feelings of fever/chills</b>                       | <input type="checkbox"/> | <input type="checkbox"/> | <input type="checkbox"/> |
| <b>Generalized weakness</b>                           | <input type="checkbox"/> | <input type="checkbox"/> | <input type="checkbox"/> |
| <b>Generalized pain (muscle, joint)</b>               | <input type="checkbox"/> | <input type="checkbox"/> | <input type="checkbox"/> |
| <b>Nasal drip (Runny nose)</b>                        | <input type="checkbox"/> | <input type="checkbox"/> | <input type="checkbox"/> |
| <b>Sore throat</b>                                    | <input type="checkbox"/> | <input type="checkbox"/> | <input type="checkbox"/> |
| <b>Cough</b>                                          | <input type="checkbox"/> | <input type="checkbox"/> | <input type="checkbox"/> |
| <b>Shortness of breath / Respiratory difficulties</b> | <input type="checkbox"/> | <input type="checkbox"/> | <input type="checkbox"/> |
| <b>Loss or impairment of your sense of smell</b>      | <input type="checkbox"/> | <input type="checkbox"/> | <input type="checkbox"/> |
| <b>Loss or reduction of your sense of taste</b>       | <input type="checkbox"/> | <input type="checkbox"/> | <input type="checkbox"/> |
| <b>Diarrhea</b>                                       | <input type="checkbox"/> | <input type="checkbox"/> | <input type="checkbox"/> |

7. Can you indicate approximately at what date you first started experiencing symptoms (DD/MM/YYYY)? \_\_\_\_\_

*Note au personnel infirmier : inscrire la date approximative. Exemple, pour début mai, inscrire 01/05/2020. Pour mi-mai, inscrire 15/05/2020, pour fin mai, inscrire 30/05/2020*

8. Did you consult a doctor for these symptoms? No  Yes

9. If so, were you tested to confirm that you had COVID-19? No  Yes

a) If yes, what was the result of the test Neg  Pos

-Date of the positive result (DD/MM/YYYY): \_\_\_\_\_

b) Were you hospitalized for this illness? No  Yes

c) If yes, how many days were you in in hospital? \_\_\_\_\_ days

10. *À poser à tous les donneurs* : Had you been in close contact with a person who had COVID-19? No  Yes

11. *À poser à tous les donneurs*: Had you been in close contact with a person who was not diagnosed with COVID-19 but had a cough and fever? No  Yes

12. *À poser à tous les donneurs, à l'exception des donneurs séronégatifs sans symptôme. Pour les donneurs séronégatifs sans symptôme, cocher « not applicable »*: In what context could you have been in contact with a person with COVID-19?

|                                                         |                          |
|---------------------------------------------------------|--------------------------|
| <b>At my place of residence</b>                         | <input type="checkbox"/> |
| <b>Extended family outside of my place of residence</b> | <input type="checkbox"/> |
| <b>Friend(s)</b>                                        | <input type="checkbox"/> |
| <b>Work</b>                                             | <input type="checkbox"/> |
| <b>Travel</b>                                           | <input type="checkbox"/> |
| <b>Don't know</b>                                       | <input type="checkbox"/> |
| <b>Not applicable</b>                                   | <input type="checkbox"/> |
| <b>Other (please specify):</b>                          | <input type="checkbox"/> |

13. Can you tell us what kind of work you normally did prior to the March 23rd lockdown? \_\_\_\_\_

14. Are you a health care worker? No  Yes

*Note au personnel infirmier: est considéré comme un travailleur de la santé toute personne qui œuvre auprès des malades dans un hôpital de soins aigus, un CHSLD, ou qui est un premier répondant. Ceci inclut les infirmières, les infirmières auxiliaires, les médecins, les préposés aux bénéficiaires et le personnel d'entretien ménager. Exclure les personnes dans ces catégories d'emploi qui ne font que du travail administratif.*
